# Supplementary material for: Royal jelly attenuates cadmium-induced nephrotoxicity in male mice
Source: PubMed Central journal article supplement (PMC6456607; doi:10.1038/s41598-019-42368-7), 2019-04-09
Supplement: 41598_2019_42368_MOESM1_ESM.pdf [file 41598_2019_42368_MOESM1_ESM.pdf]

## Royal jelly attenuates cadmium-induced nephrotoxicity in male mice

Rafa S. Almeer<sup>1,\*</sup>, Gadah I. AlBasher<sup>1</sup>, Saud Alarifi<sup>1</sup>, Saad Alkahtani<sup>1</sup>, Daoud Ali<sup>1</sup> and Ahmed E. Abdel Moneim<sup>2</sup>

<sup>1</sup> Department of Zoology, College of Science, King Saud University, Riyadh, Saudi Arabia

<sup>2</sup> Department of Zoology and Entomology, Faculty of Science, Helwan University, Cairo, Egypt

**Supplementary Table 1.** Primer sequences of genes analyzed in real time PCR

| Name          | Accession number | Forward primer (5'---3') | Reverse primer (5'---3') |
|---------------|------------------|--------------------------|--------------------------|
| <i>Gapdh</i>  | NM_017008.4      | AGTGCCAGCCTCGTCTCATA     | GATGGTGATGGGTTTCCCGT     |
| <i>Sod2</i>   | NM_017051.2      | TAAGGGTGGTGGAGAACCCA     | TGATGACAGTGACAGCGTCC     |
| <i>Cat</i>    | NM_012520.2      | TTTTACCCGACGAGATGGCA     | AAGGTGTGTGAGCCATAGCC     |
| <i>Gpx1</i>   | NM_030826.4      | CAGTCCACCGTGTATGCCTT     | GTAAAGAGCGGGTGAGCCTT     |
| <i>Gsr</i>    | NM_053906.2      | TACTGCACTTCCCGGTAGGA     | TGGATGCCAACCACCTTCTC     |
| <i>Nfe2l2</i> | NM_031789.2      | TTGTAGATGACCATGAGTCGC    | ACTTCCAGGGGCACTGTCTA     |
| <i>Nos2</i>   | NM_012611.3      | GTTCCCTCAGGCTTGGGTCTT    | TGGGGGAACACAGTAATGGC     |
| <i>Il1β</i>   | NM_031512.2      | GACTTCACCATGGAACCCGT     | GGAGACTGCCCATCTCGAC      |
| <i>TNF-α</i>  | NM_012675.3      | GGCTTTCGGAACACTACTGGA    | CCCGTAGGGCGATTACAGTC     |
| <i>Bcl2</i>   | NM_016993        | ACTCTTCAGGGATGGGGTGA     | TGACATCTCCCTGTTGACGC     |
| <i>Bax</i>    | NM_017059.2      | GGGCCTTTTTGCTACAGGGT     | TTCTTGGTGGATGCGTCCTG     |
| <i>Casp3</i>  | NM_012922.2      | GAGCTTGGAACGCGAAGAAA     | TAACCGGGTGCGGTAGAGTA     |

The abbreviations of the genes; *Gapdh*, glyceraldehyde-3-phosphate dehydrogenase; *Sod2*, superoxide dismutase 2 mitochondrial (MnSOD); *Cat*, catalase; *Gpx1*, glutathione peroxidase 1; *Gsr*, glutathione reductase; *Nfe2l2*, nuclear factor erythroid 2-related factor 2; *Nos2*, inducible nitric oxide synthase; *Il1β*, interleukin 1 beta; *Tnf*, tumor necrosis factor; *Bcl2*: B-cell lymphoma 2; *Bax*, Bcl-2-like protein 4; *Casp3*, caspase-3.

Supplementary Figure S1: Full-length blots/gels of different proteins.

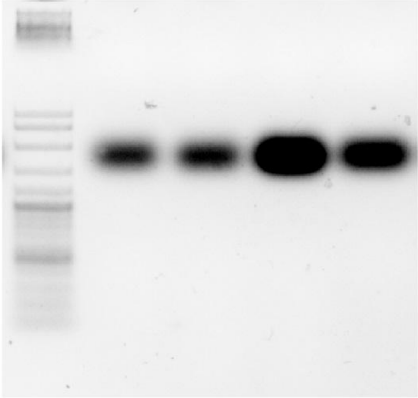

**NF-kB**

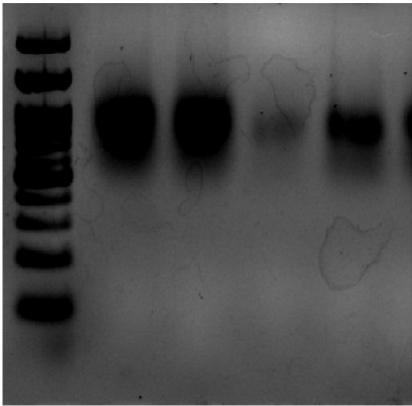

**Nrf2**

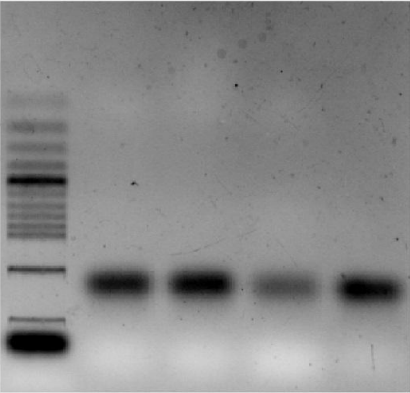

**HO-1**

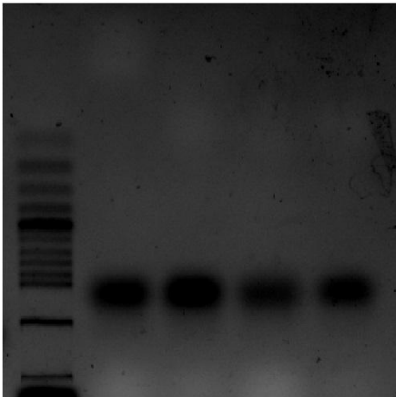

**Nqo1**

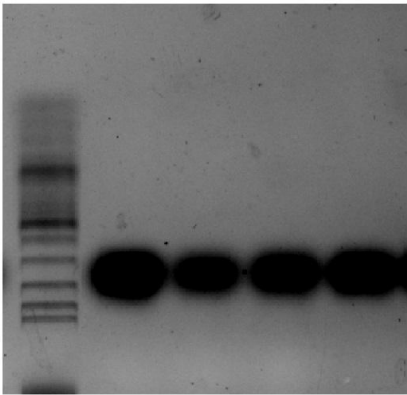

**B-actin**
